# Supplementary material
Source: Springer Nature journal article supplement (https://www.springermedizin.de/resource/supplementary/12894_2011_187_MOESM6_ESM.pdf/9513146)

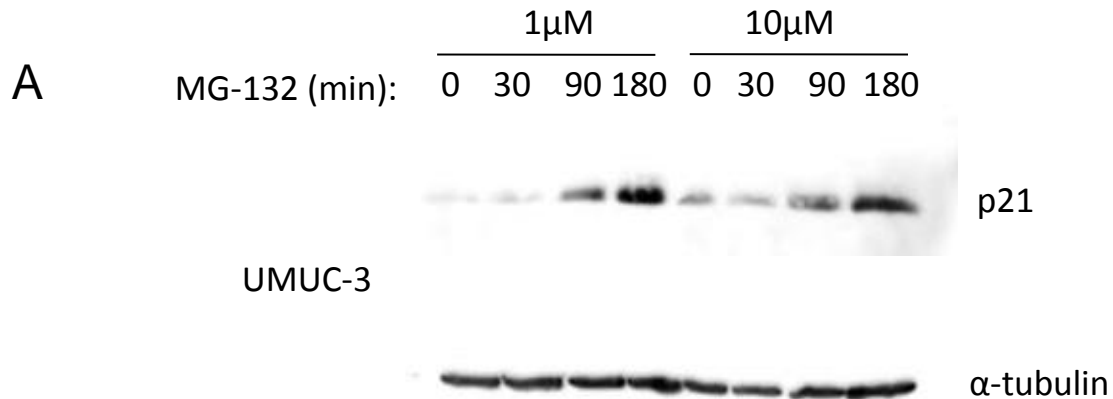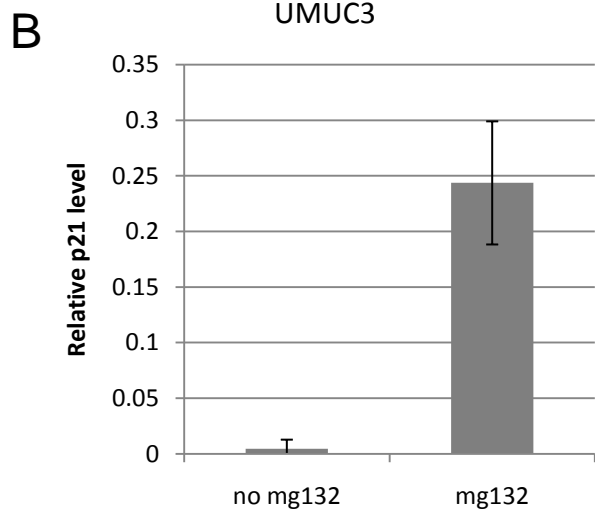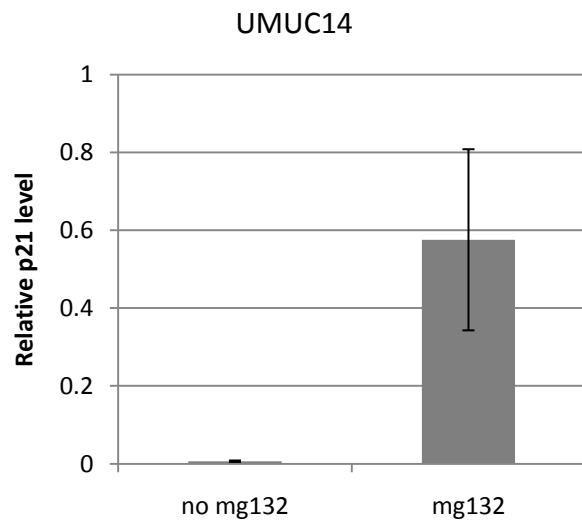

Supplement: MOESM6 [file 9513146]
